# Supplementary material
Source: ML conference proceedings conference paper supplement (https://proceedings.neurips.cc/paper_files/paper/2022/hash/31d0d59fe946684bb228e9c8e887e176-Abstract.html)
Supplement: Supplementary file 1 [file 31d0d59fe946684bb228e9c8e887e176-Supplemental-Conference.zip]

Archive with 39 entries (25 files):
- NaturalColorFool_nips/
- NaturalColorFool_nips/adv/
- NaturalColorFool_nips/adv/adv
- NaturalColorFool_nips/attack_pipe.png
- NaturalColorFool_nips/config_NCF.yaml
- NaturalColorFool_nips/dataset/
- NaturalColorFool_nips/dataset/get_lib.py
- NaturalColorFool_nips/dataset/labels.txt
- NaturalColorFool_nips/main.py
- NaturalColorFool_nips/README.md
- NaturalColorFool_nips/segm/
- NaturalColorFool_nips/segm/_base_/
- NaturalColorFool_nips/segm/_base_/datasets/
- NaturalColorFool_nips/segm/_base_/datasets/ade20k.py
- NaturalColorFool_nips/segm/_base_/default_runtime.py
- NaturalColorFool_nips/segm/_base_/models/
- NaturalColorFool_nips/segm/_base_/models/upernet_swin.py
- NaturalColorFool_nips/segm/_base_/schedules/
- NaturalColorFool_nips/segm/_base_/schedules/schedule_160k.py
- NaturalColorFool_nips/segm/configs/
- NaturalColorFool_nips/segm/configs/upernet_swin_tiny_patch4_window7_512x512_160k_ade20k.py
- NaturalColorFool_nips/segm/get_segMasks.py
- NaturalColorFool_nips/segm/pretrained/
- NaturalColorFool_nips/segm/pretrained/pretrained_model
- NaturalColorFool_nips/torch_attack/
- NaturalColorFool_nips/torch_attack/__init__.py
- NaturalColorFool_nips/torch_attack/attacks/
- NaturalColorFool_nips/torch_attack/attacks/attack_utils/
- NaturalColorFool_nips/torch_attack/attacks/attack_utils/color_space.py
- NaturalColorFool_nips/torch_attack/attacks/attack_utils/loss_fn.py
- NaturalColorFool_nips/torch_attack/attacks/attack_utils/object_name.py
- NaturalColorFool_nips/torch_attack/attacks/attack_utils/transfer_colors.py
- NaturalColorFool_nips/torch_attack/attacks/NCF.py
- NaturalColorFool_nips/torch_attack/base_attack.py
- NaturalColorFool_nips/torch_attack/ensemble.py
- NaturalColorFool_nips/utils/
- NaturalColorFool_nips/utils/general.py
- NaturalColorFool_nips/utils/models.py
- nips2022_446_Supplementary_Material_rebuttal.pdf
