# Supplementary material
Source: ML conference proceedings conference paper supplement (https://proceedings.neurips.cc/paper_files/paper/2022/hash/31d0d59fe946684bb228e9c8e887e176-Abstract.html)
Supplement: Supplementary file 1 [file 31d0d59fe946684bb228e9c8e887e176-Supplemental-Conference.zip › NaturalColorFool_nips/config_NCF.yaml]

########################################################################
# 1 Basic settings(In general, there is no need to change these settings.)#
########################################################################

# attack mode: 'untargeted' or 'targeted(least-likely)' or 'targeted(random)' eta
attack_mode: !!str untargeted  
# Types of returned adversarial samples. 'float' or 'int'
return_type: float   
model_mode: !!str 'torch'  # torch|tf|timm
local: True  # Does it run locally? (Default: True)
device: 'cuda:0'

########################################################################
# 2 Set up the test model and data. 
########################################################################
white_models_name: ['inception_v3']
black_models_name: ['vgg19', 'resnet18', 'mobilenet_v2', 'densenet121', 'resnet50'] # Black box and white box cannot have the same model!

label_path: 'dataset/labels.txt'
img_dir: 'dataset/images'
masks_path: 'segm/masks.npy'
color_dir: 'dataset/lib'

output_dir: 'adv'
data_range: [1,1001]  # [start, end)
batch_size: !!int 20

########################################################################
# 3 NCF 
########################################################################
color_mode: !!str Lab
num_reset: !!int 10  # The number of initialization reset (Default: 10).
eta: !!int 50  # The number of random searches (Default: 50).
num_iter: !!int 10  # The iteration of neighborhood search (Default: 10).
T_step: !!float 0.013  # The iterative step size of T (Default: 0.013).

momentum: !!float 0.6  # (Default: 0.013)
