# Supplementary material
Source: ML conference proceedings conference paper supplement (https://proceedings.neurips.cc/paper_files/paper/2022/hash/31d0d59fe946684bb228e9c8e887e176-Abstract.html)
Supplement: Supplementary file 1 [file 31d0d59fe946684bb228e9c8e887e176-Supplemental-Conference.zip › NaturalColorFool_nips/dataset/labels.txt]

389
577
327
138
91
982
10
472
304
968
451
327
580
975
625
18
664
968
426
653
465
810
108
673
254
854
973
704
108
964
354
606
760
983
484
734
561
484
561
566
719
306
484
973
771
571
324
816
962
539
114
878
822
367
763
753
760
744
894
50
23
826
477
459
471
98
815
583
581
620
876
610
422
514
776
702
923
469
95
979
142
228
566
556
966
991
859
518
815
761
778
985
855
932
608
870
657
898
960
960
423
860
641
650
58
410
473
431
422
141
499
566
405
582
416
539
769
820
440
337
51
304
34
709
476
442
309
991
512
645
342
583
699
920
975
311
882
898
974
481
310
620
115
476
972
479
708
874
545
437
854
480
913
880
308
471
458
361
80
650
443
108
638
971
786
934
657
522
511
866
24
858
499
519
763
866
481
874
477
316
610
912
498
347
826
739
840
498
806
327
704
534
848
312
924
949
386
916
769
688
980
885
573
806
664
780
960
909
600
133
896
422
980
328
697
676
638
790
742
822
921
706
780
862
512
151
604
955
821
294
708
631
469
332
100
737
515
653
973
392
848
596
133
493
918
82
764
51
971
114
974
851
2
979
133
336
144
922
563
322
880
304
356
437
100
920
284
542
318
755
405
538
831
309
932
490
407
598
920
800
945
98
960
542
901
866
34
147
662
996
33
719
108
680
815
527
2
874
339
719
840
976
397
885
58
244
771
821
480
821
321
631
114
874
430
971
968
977
604
571
854
230
946
320
536
657
145
920
918
884
74
386
928
473
747
422
911
880
968
558
555
254
441
988
548
923
138
534
699
488
991
418
604
625
518
328
320
519
387
405
750
416
570
991
852
10
718
348
556
818
866
412
630
964
518
265
896
547
904
709
318
142
23
761
773
979
683
747
939
473
865
766
755
706
615
310
885
472
699
885
973
402
971
631
311
13
539
539
39
668
341
606
548
653
938
778
666
686
512
309
3
470
718
981
252
739
830
558
818
834
830
459
980
888
960
884
854
310
893
520
476
563
558
984
673
438
130
929
638
468
709
859
629
583
158
52
985
105
442
596
947
522
546
947
580
864
11
456
434
456
481
913
909
349
718
471
875
885
719
965
848
439
982
572
793
875
595
475
775
629
672
702
79
947
477
975
821
312
964
937
635
428
58
327
345
964
826
607
766
660
479
689
417
548
709
558
307
994
934
548
990
708
820
765
780
683
735
401
976
717
965
52
655
719
909
133
558
408
305
100
641
855
934
980
441
437
490
318
888
830
341
95
888
563
818
537
14
581
971
720
321
438
991
686
806
581
718
592
956
76
833
484
418
780
699
532
704
923
322
313
481
325
668
604
418
760
511
696
526
309
143
898
499
889
304
650
407
842
38
321
581
951
822
657
666
806
468
950
472
17
647
986
950
918
867
704
875
145
931
826
664
859
490
617
821
320
844
548
438
669
522
653
647
883
403
891
750
826
818
472
676
734
859
323
913
934
303
769
767
443
912
975
512
641
583
662
260
100
324
498
981
9
920
763
455
431
101
121
738
405
456
880
400
641
830
891
976
976
981
131
536
143
345
808
326
662
480
480
739
806
829
598
426
947
629
760
533
866
469
896
310
657
582
469
240
566
693
896
598
859
633
968
505
752
913
384
318
40
545
581
990
704
985
845
484
702
673
875
4
512
914
620
752
631
976
760
934
625
982
473
777
407
992
519
352
490
889
867
518
673
972
972
672
735
348
921
443
923
833
145
780
459
95
718
815
986
979
905
281
319
888
348
347
672
669
404
323
735
963
676
469
296
671
14
547
738
458
404
113
986
763
909
583
706
566
487
830
962
472
696
437
875
884
706
348
747
975
556
635
320
561
763
560
574
981
662
923
924
662
536
71
898
541
790
792
916
708
669
431
498
325
519
297
822
300
329
161
556
948
986
647
618
854
808
977
431
833
896
986
95
764
886
874
563
473
666
323
442
438
321
901
518
404
815
878
22
490
752
655
312
629
979
641
40
777
735
134
788
822
638
449
655
407
647
556
392
437
118
735
981
305
629
519
610
742
563
734
443
693
311
752
820
536
547
709
367
887
706
672
888
301
604
132
305
324
526
459
973
591
717
752
820
889
631
336
831
609
404
611
781
564
669
738
868
120
561
285
848
980
818
782
499
880
964
982
540
498
699
650
664
990
98
386
781
742
721
349
443
909
884
950
788
638
288
673
977
567
918
716
302
477
561
324
418
669
143
85
305
521
771
477
529
720
672
848
459
881
390
650
977
363
982
921
744
918
963
547
820
325
913
