# Supplementary material
Source: ML conference proceedings conference paper supplement (https://proceedings.neurips.cc/paper_files/paper/2022/hash/31d0d59fe946684bb228e9c8e887e176-Abstract.html)
Supplement: Supplementary file 1 [file 31d0d59fe946684bb228e9c8e887e176-Supplemental-Conference.zip › NaturalColorFool_nips/torch_attack/attacks/attack_utils/object_name.py]

objectNames=['wall',
    'building',
    'sky',
    'floor',
    'tree',
    'ceiling',
    'road',
    'bed',
    'windowpane',
    'grass',
    'cabinet',
    'sidewalk',
    'person',
    'earth',
    'door',
    'table',
    'mountain',
    'plant',
    'curtain',
    'chair',
    'car',
    'water',
    'painting',
    'sofa',
    'shelf',
    'house',
    'sea',
    'mirror',
    'rug',
    'field',
    'armchair',
    'seat',
    'fence',
    'desk',
    'rock',
    'wardrobe',
    'lamp',
    'bathtub',
    'railing',
    'cushion',
    'base',
    'box',
    'column',
    'signboard',
    'chest of drawers',
    'counter',
    'sand',
    'sink',
    'skyscraper',
    'fireplace',
    'refrigerator',
    'grandstand',
    'path',
    'stairs',
    'runway',
    'case',
    'pool table',
    'pillow',
    'screen door',
    'stairway',
    'river',
    'bridge',
    'bookcase',
    'blind',
    'coffee table',
    'toilet',
    'flower',
    'book',
    'hill',
    'bench',
    'countertop',
    'stove',
    'palm',
    'kitchen island',
    'computer',
    'swivel chair',
    'boat',
    'bar',
    'arcade machine',
    'hovel',
    'bus',
    'towel',
    'light',
    'truck',
    'tower',
    'chandelier',
    'awning',
    'streetlight',
    'booth',
    'television',
    'airplane',
    'dirt track',
    'apparel',
    'pole',
    'land',
    'bannister',
    'escalator',
    'ottoman',
    'bottle',
    'buffet',
    'poster',
    'stage',
    'van',
    'ship',
    'fountain',
    'conveyer belt',
    'canopy',
    'washer',
    'plaything',
    'swimming pool',
    'stool',
    'barrel',
    'basket',
    'waterfall',
    'tent',
    'bag',
    'minibike',
    'cradle',
    'oven',
    'ball',
    'food',
    'step',
    'tank',
    'trade name',
    'microwave',
    'pot',
    'animal',
    'bicycle',
    'lake',
    'dishwasher',
    'screen',
    'blanket',
    'sculpture',
    'hood',
    'sconce',
    'vase',
    'traffic light',
    'tray',
    'ashcan',
    'fan',
    'pier',
    'crt screen',
    'plate',
    'monitor',
    'bulletin board',
    'shower',
    'radiator',
    'glass',
    'clock',
    'flag']

def getObjectName(code):
    if code == 0:
        objectname = "others"
    elif code <= len(objectNames):
        objectname = objectNames[code-1]
    return objectname
