# Supplementary material
Source: ML conference proceedings conference paper supplement (https://proceedings.neurips.cc/paper_files/paper/2022/hash/31d0d59fe946684bb228e9c8e887e176-Abstract.html)
Supplement: Supplementary file 1 [file 31d0d59fe946684bb228e9c8e887e176-Supplemental-Conference.zip › NaturalColorFool_nips/torch_attack/ensemble.py]

# The default integrated attack method used.
def get_ensemble_models(models, models_names, model_mode, images):
    r"""
    Function for ensemble models
    """
    logit, aux_logit = 0.0, 0.0
    for model_name in models_names:
        if model_mode == 'torch':
            logit += models[model_name](images)
        elif model_mode == 'tf':
            output = models[model_name](images)
            logit += output[0]
            if len(output) >= 2:
                aux_logit += output[1]
    logit /= len(models_names)
    if model_mode == 'tf' and len(output) >= 2:
        aux_logit /= len(models_names)
        return [logit, aux_logit]
    return logit
