# Supplementary material
Source: ML conference proceedings conference paper supplement (https://proceedings.neurips.cc/paper_files/paper/2022/hash/31d0d59fe946684bb228e9c8e887e176-Abstract.html)
Supplement: Supplementary file 1 [file 31d0d59fe946684bb228e9c8e887e176-Supplemental-Conference.zip › NaturalColorFool_nips/utils/general.py]

import os
import torch
import random
import numpy as np
from PIL import Image

def seed_torch(seed=0):
    """Set a random seed to ensure that the results are reproducible"""  
    random.seed(seed)
    os.environ['PYTHONHASHSEED'] = str(seed)
    np.random.seed(seed)
    torch.manual_seed(seed)
    torch.cuda.manual_seed(seed)
    torch.cuda.manual_seed_all(seed)
    torch.backends.cudnn.deterministic = True
    # torch.backends.cudnn.benchmark = False
    # torch.backends.cudnn.enabled = False

def mkdir(path):
    isExists = os.path.exists(path)
    if not isExists:
        os.makedirs(path)

def save_img(images, filenames, output_dir):
    """Save images(Tensor)"""
    mkdir(output_dir)
    for i, filename in enumerate(filenames):
        # Add 0.5 after unnormalizing to [0, 255] to round to nearest integer
        ndarr = images[i].mul(255).add_(0.5).clamp_(0, 255).permute(1, 2, 0).to('cpu', torch.uint8).numpy()
        img = Image.fromarray(ndarr)
        filenames = filename.split('.')[0]+'.png'
        img.save(os.path.join(output_dir, filename))  
